# Supplementary material
Source: PubMed Central journal article supplement (PMC3946947)

**Fig. S1**

**TgIF2K-C**

cattttcatctttttcagctgctcgtttatatgcaggetctttattgttttttattgcatcttgacagcgtcttggt  
tccgacgtctatgccagccagcagtcacgcgagagcagccgccagacactccgcgacttggtctgcacgagatgc  
acgcagaaaagctgtaaggaacccaccattcttcgtttttcgctccttgctcgtccttcttacaattcaacaacctc  
agatgctatcgttcttctttttctgagctcttgcttgtagacatcttcgcgctcttactgcattctactgcacagccg  
cagaaagctcagatgcacagagtgcatgctcgacgcgcacagactgagacaagaggcggccgacacattggagtgcc  
caaagctgtcacttatgtttttcttttttttggaaagagaagcgactgaacgagcaagagccagctgtccccttct  
ttaaagggagagattcgcatggagtcggcattcacgcgaacgcgggtgcccgccgatcgactcaaaaatcgacgaacg  
gatttggtcttttcttgccagacgaggtcgtttttggtgccatttcccgcgctgaagtccgttcaccggttcgtctttt  
gttctctcttgctgctgactctgcttttccattgggctgtccggcagcagcggccaaccctccacgccccaaactcg  
tggttccacgcgcgactgtagggcaggaggttactggctcttccccctgcggttttctctcttcttcttttcttctcgc  
gcgctgggttgccgcagttggttcgctccccctctcgcggagacgctccgaccaccgaacactgagggg**ATGGAAGAAA**  
**AGACA**ACTCGGGGAGGCCGAGGCAGAGAAGGGAATGCGTGCCTGCTCCGCTCGCTCCTGCTTCTTGAAGCGCGTCCC  
GTCAGTCCCCGCGTCTCTTTCTCGATTCTGTCTCTCGGCTTTCTCTCCTCAACCGCACACGGCCTCGTCGAGTCTGT  
GCAGACACGAGCGACTTCGCATGCAAGTTCTCCAGCCTCCTCGGTGCGTTCTCGCCCTCGGTTTACGCGCTGCGC  
CGCCGTCTCCGTCTCGCCCTCTCAAAGCCTCTCGAGCTCCGCGGCTCCGGGGCTGTGGGGTGTCTCCCTTGCCCTCA  
GCGCGGCGTCTCCTCTTGAGGAGCAGAAGAAGGAGACAGCGACTCTGGCGGCGCTCGCGACCTACGGTCTCTGCTC  
CTCGGTGAACCAGCAAGCGTCGTGGACGTGGGCAGATCCCTCAGACTTCGACGCCTTTTTGCCTGTGAGCGACGGCG  
AGGCCGACGTCGTCTTCGATGCAGACTCCAAAATGACGAGGAAGATGGACTCTTTCAAAGAACCGGAGACACCGAG  
GAACCTGAGAAGCCGTGCGTCGTGCGTCTCGTGAAGTTCGCGGCAGAAAGGCAAACGCGCCCGGGCGCCGCGACG  
CTCCCCGGTGTCTCCGCCATCGAGTTTGAAGCTCGTCTCTCGCCCCCTCATTCTCATCATGCATCGGGGAGTTGCG  
TGCACATTGAGACGTGCTGCGATGTATCCGGGGGTTGCCCTTCGACATTTTGCATGGAGGCGCAGGAGACGATTTCT  
CTCGGCGTTTCTTCTCCCTGTCTCTGTCTCCTCCGTGGCGACAGAGAGGCGCGAGAACAGGGAAGCGAGCGAGAGCGT  
TCCAGAGGCCATTTTCGATTTAGAGCCGGTGGAGAAGCTTCTGCACACTTCGGCCGCGCTCGAGGCTCTGCTCGTGA  
GTTTTCTCGAGAGCCGCGGAGAGCCAGACGCGGAGGAGAGTTCGTTGAATCGCCAGCGAAGGGAGAAGGACCGGGCG  
TCTCTAGCGAGTTCCAGAGAGCGCCTTTTTTCGAGCCATCTCACGCAGTTTCTGCATTTTTTTTTTCGACTCCACGAG  
CGACTCTTCCAGCGTGAGTCGCCGCTGCTCTGCGCTTGCCGGAGAGACGAACCGACTCCACCGCGGCGAGGTCGATC  
GCGAGAAGGCGAAATCGCGACATCGAGTTTCTTTTCAAGATGCGCATGCAGAGATCGGAAGGGACGTACGCGGCGCC  
GAGACATCCAAGACTCCCTGCAGCTTCTCCAGCTGCGCGTGCAGTACTGCAGGCCCCATGAGCCGCCGCGCGT  
CACTGCGGCGCCGTCCAACCTCGCCAGCTCGCCCTCTGCGTTCCTGCGCGACCCCGAAGGAGACGCTGTGCCTGGAG  
GCGCATGCAACGCAGAGACCCCGTGGGCGGCGGTCCGGGATCAGAGAGAGGAACGACGCTGGAAGCGCAAGCGAGT  
CTGTTTCGAGAGAGCGAGGTGTGCGGACGAAGAAAAGAAGCGAGAAGACGAGGCGGCAGACGCCTCTATCGGAGACAC  
TGTCGCCCAGACGAAAGAGCGGCAACTTCTGTGTTGTCTCCAACGCGTGTCTCCTCGGTCTGCAGAAGAGAGAAAGC  
GACGCAGTGGAGAGGGATGTACGACCCAGGCCGACTCGGGGCCGTCTGCGCCGATGTATGGAGGCCGAGCTGTCTG  
GCTCAAGCCACAGAACGGACGTATGCAGTCCGTGTTGAGGAAGGTCCGTGTCACTCAGGCACACAGTCCGAAAGAGG  
AACAAACAACGGAGAAGCGTCGCGAGTCGGCGTAAAAGACATGTTTGCATCCGCGCTGGGAGAAAGGAGAGAATCAG  
GAAACGCAAAGCCGGCGGGCAGCTGTGGCTGGACTCCTTCGGATCGGGGACGCCCGGTGGAGAAGGAAAGAGTCTT  
CAAGGTAATGCCGCTACAGTCTTTGCCGTATCTTCGCGCTCCCCGCTTGAGGCGCCAATGAGTGGAGACGACACCGA  
GAGACGGGGAGCAGCGTCAGGAGATGACGCTGAAGGCCGACAAGACAAAAAAACCCTGCCCCCTCTCCGTCCAAT  
CAGCTTCTTCTCCAGATCCTTTGCCTTCTTCGCTTTTGTTTTTTTCGCTGCGTTCGCCGTGTGATCTGTCTTGTGTC  
TCAGTGTATGTTTTCGAGTGTCCACCAGGCATCGTTGGACTTGGCGCCGAGAACGCTGCCAAGGCCCAAGCGAG  
AACGGCCGTTCTCTCGCGCTTGGGAGGTGTCAAGTGCATGCAAAGAAGGCGCAACGGCGCGCTCTCAGTGATTCAAG  
AAGAAGGCGAAGAGGAGAGACTGAGACGCAGGGGACGCAGAGCGAGGACCGCAGCGGAGCCCGTGGCGAGAAGAAG  
CAACAGACAGAGAAAGACAAAGAGAAGGAGAAGAAGGAGAAGACGGACAAGCATGACAAGCATGACAGGAAAGACAA  
GAATGACAAGAAAGAGAAGGAGGTCAATGGAGATGAAGTGGAGAGAAGAGAAGTACGAGGTGTGGAGGAGTTGGTGG

CCTCTGAGAGTAGCCCGGCGCATGAGGCGCGGGGGCGAAGCCTAGCGCAGATGTGGGGGAGTCCAAATATGAGCGC  
GACTCTGAGATGGGGAAACGAAGCCCAGAGGTCACGAGTCGATACCACACAGAGTTCATCGAACTTCAGCAACTCGG  
GTCAGGCGGCTTCGGCAGCGTCACAAAGGTTCCGCCAGCGGCAAGGGGGAGGCATTTTCGCCGTGAAGTGCATTCCCTC  
TGCGTCCAGCTCGAGTGCGGGCGCCACGGCTTCTGTCCAGGCCAGGGTCGGGAGCGAAACCTCGCGCGCGCCGGTGG  
AATTCCACGGGCCGCGGCATGCGGGCCGATGCAGGTGACGCACAAGCTGCGAAGCGGCTGGAACGAGCGCGAATGCG  
AAGTTTCTCCGGAAACAAAGCGAAACGGCGTGTAGGTGGACAAGTCTGTGCTCTCTCGGGGCCGCGACAGAACTCTG  
ACCAAGCTCCTAAAGACGGTGCATGCAAACAAGCGGCCCGCCGAAACGCAGAGACGACAGCCTCAGCCCCACAGAC  
TCCCAAGACACCTACGACGACGCCGTCCGGCTACATGGAGGAAGCAACGATGCTCGCGAAACTCAACCACAAGCATAT  
CGTTTCGTTACTACGACGCTTGGCTCGAAGTCACAACGCCTTTGCGGGCGGGTCTCGCCAGACTCTTCGTGTGGAGCCG  
AAGAAGGAGATCCGAGCAAATGTCTCTTCATCCTCATGGAGTACTGCCAGGTGCGACTCTGCGAGAGGCAATCGAT  
TCGGGACTTCTTCAGCTTCCGCCTGCGTTCGTTCCGACAGACGCTTCGGAGACGCCAGACGGCGAACCAGTCTCCGA  
GACGGCCGCTGTGCACCCGAAGCAGGCCGTGCATGTCTGGGCTCCTCTGCGTACGTCTCTTCTTCTCTTGTGCT  
CTCCGTCTTCTTCGCGCGCAGCCTCGGAGCTTCGAGGCGCCGGCGCGGCTGAGACGCTCGCGCCCAAGGGAGGAGAA  
CCCCAGGGCAGGCAGGAAACGAAGAAGCAAGAGAAGCGCGAGAAGAAGTTCGAGGAAGAGGATGACAGCGAAGAAGA  
GCGACGGACAGAGGCGGAACGGAGAACCAGCCAGATGGGACTGCGCGCTCTCAAGTGGAGACTCACCCGCGACC  
TCGTTCGGAGGCGTTCGTTACATGCACTCTTTCGGCGTTCATCCATCGAGACCTGAAACCCAGCAACATTTTCTCAAG  
GTGGACCAAGACCGCCTCTGTGTCAAGATCGGCGATTTTCGGCCTGACGACGACCGTGTGAAAGGGAAGCCTGGGGG  
TTCGCAAGCTGCGGGAAGGCGGCCTCGCACTCGGGGACCAGCGGAGACACACCTATGGGCTCTGGCGCGTCGGTCC  
GGCCGCTCTCAGGCTTTTCTGTCCGTACAGGAGGTCTGTGAAGCGAGACCGAACGGAGGCAAACCGCACCCCGGC  
TGTCTCAGCCTCTCCAACGTCTCCCTCTCGTTCCGCCTCTCTCCTCCTTCCCGGCTCTCACCCAGCGATACACC  
TTCTCTTCGACTCTCTGCCGGCGTTCGGCACGGTCTACTACATGGCTCCCGAACAGGCTACTGGCAGCCGCTACGACC  
AGAAGGCGGACATCTTTTCGTTGGGTGTAGTCTTGTGTTGAAATGTGGGCGCCGCTTTTTCACGACGGCGATGGAACGC  
GCCTCTGTGCTGGGGCAGTTGACGCTGGATCACGAACAGCAGATGCGGCGGCTGTTGCCTCGACAGGCAGGCAAGGC  
CCTTCTCCTTCCACTCCCCGGCGCCTCTGAAGCACCGAGAGAAGAAGGACGAGGGCGACGGGGGGGGGAGGCCT  
CGAGTGTGCGCTGCAGTCTCTCGCCTATCCGCGCCTCTGCGGCCTCGGCAGCAACCGCGGAGACAGCAGCGCGAG  
AACCTGCTTCTCCAGAGGACCGAAGACGAGAAGCGGCGTCTCGGCGCGGGCGGACCCCGCGGACCCCGCGCC  
CTCCGACTTCACTCCGTTTCGACACCCTGACCTTCTTGAAGCAGTATGTGCCAAGCGAAGTTCGCCCGCTGATTCTCG  
CCATGATTCAACAGGACCCGCGCCAGCCGTCCTGCGGCAGACGCACTGCTTGTGACGACGTTCTCCTCCTCTCGAG  
CTCAGCCAGGCGCTGCCTCTGGGCGTTCGTCGACGAGTACGAAGTTCGACCTCGTCAGATCCTTCTCTCACGAGGCTCC  
CAGCAGACGGACAGAAAAGAACGGACGAAGGGGCGAGAGCGGGAAACATGGGGGTCTGGCATGCGTTCGAACTCGC  
ATGCACTCGGGGCTTCGCGTGGGGAACCTCGAGCGCGGGGCGAGGCCAGAGACAGGGCCAGCAGGGAGCAGCGGGG  
ACCGGTGAGGCTCTCGAGGCGGGGGTCCGCTGCGGGCCGAAGCGCGGGAAGGCCGACGGGCGGAGCGAGAGACAGG  
CGGAGAAGTTCGAGGGACCGAGTTTGGCTTCTGTGGGCTCCGAAGGTGAGGGCGACGACGCGGGCGGGAGGCGAGGCGG  
GGGCGGGAGGCGAGGCGGGGGCGGGGAGAAGGACGAGGACCGCCGAGGAGACAAGGCTAAGGAGAAGAAGAGACAGGCG  
GCCGAGGAAGAGCCGGGAAGCGAGCGGCGGTGGATCGAGGGCGCGCGAGGTGGCGAGAAGGCCGGGGTTCGGAGACCT  
CCGGGTGGAGAGAGACTGCAGGCCACTCTGCGCATCCGTGCTGTGTTTTCAGTCAAACATGCGTTCGAGGTTCGACA  
CCGTTACGCAGAGTGTGGGGGGCGCCGAGAAGAGCGAGAGAGACGGAGACGAGGAACCGATCGCGAGGGCCACAGA  
GCCGGTGGGGGCTCCGGGCGAGAGAAACGCACAGTCCCGTCTCCCCTGGCGCCGGGGCCAGGAGGGGCGAGGCGAG  
TGACGAGGAAGAGAGCCGAGAACAGGAGAAAAAACATGAGGACGCGCTCTGCGTGAGGCGCGCCCGCTCTGG  
GTCACCCTTTTCAAACGCATCTACGATGTATTGCCTCGTACCCTTTCTCCAACGAAGCCGTTCAAAGTCATGGCGACT  
CTGCTGAACAGACACGAAGACGAAGCTGCTCTCCACCCTTCTTCTCCTCAAACGCGCCCTCGCGTCCGAGGGCAT  
TCTGCTGTATCGTCTTCAAACAGTTTATTTCGCGGATTAGTCCGGCAGCATTGCGCGAGTTGCTTCGAGCGCCGCGGCG  
CGACACAGATTTCTCTCCCGCTCTTCTTCTCTCACGGGTCCGGTGGCGGGGAGTCTGAGCTGGACGCGGGCGGCTG  
CTGCGGCATTCCAAAGTGATTCTCGATTTGAAGGAGAAGCAGGAAGACGCGCAGAGGCGGGTGGAGGCTGCCCTCAA  
GAACAAGGGAGCGCTTCGCACGCGGGCGGGCCTCGAAGTGCCTCTCGGTGCTGGAGAGTTCAGAGGGCAAGGGAGGCG  
CTGCCTCGGATGGAATGTGTGAGAAGACCCGAGCCGAGCAGGAAGGCGCGTCCGTCTCTCGAATGCCGCCAGCC  
CCGACGCCGGCCTTCGCACGCTCTGCGGGTGCCTCCGTCTCGGCTGCTCGGCCTCCCGCGATGTCTCTTCGGCGCG  
CGACCGGCCGGGCTGCCGCTCCCATTTGTTTCGAGTTCGGTCTTCCGTCCCTTTCTTCTCGAGTGAAGCCGCG  
TCCAGCCTTTCGCGCTCGGTTCCCTTTGCCTGTCTGCCGATCCACACGGCCGTGGCGCCTGCGGCGGGGGTGTGT



gggattcttttgtgagcacttcgctttcagagcgccgttgacaggttctcctgtttctctgggtcagatccccgcgc  
atgacccagcagctctcctgagctctgtggcctgtgtcgcgctgttgagaagccaagcgaggaagtggatgctt  
ctgaagagagcgggaactccaacacgaagaacgagaagaaggaaagaagagcgcggggagcagagagaaagaaaagc  
agaggaagaacgaagaaccacaagt cgaaggaggacaggagaaagaattggcgagacatgacaggcaaaagaagt  
ctccgagtgcgtttatctccagatgggtatctggcaagttgctgggtcggaagagaatggagaaaggcttggactcag  
gcgttgccacgcgagccgagaaggagagcttcccatctgctgagtgaccaacgaagttcttcgaagttcgagagc  
tcttgagtgcctctgctgggtccgtggaactcgctgtacagacagcgttaggctctcagaagcaacacgggtctcgct  
tcgctgctgctgctgctttcacatgtctctcgatcacgtgctggggacgcctgagagagcaggaaggcctctcgcgat  
gcagatccgcttctgctgctgtggagttgtcaagcgacctctgtggttgcagtcagtcatacaactgggctctgt  
gtagagaactgccggagtgcctttcgcgcgctctgctttccagatgaggagaggaaagcagaacagcagcgcgcat  
gcaaaactccgcaaggtgcaggaggagagtcacctcatgagacttgagatacctcaaaaaaaaaaaaaaaaaaaaa

## TgIF2K-C aa 3269

MEEKTRGGRGREGNACLLRSLLLLEARPVSPRVFSILSLGFLSSTAHLVESVQTRATSHASSPASSVGSPPSVSRAAPPSPSR  
PSQSLSSSAAPGLWGVSLASARLLLEEQKKTATLAALATYGLCSSVNQASWTWADPSDFDAFLPVSDGEADVFDADSDNDEE  
DGLFQRTGDTEEPEKPCVVVGLVEVAAEGKRARRRRRSPGVSAIEFEARLSPPHSHHAGSCVHIETSLRCIRGLPSTFCMEAQET  
ISLGVSSSLSLSSVATERRENREASESVPEAISHLEPVEKLLHTSAALEALLVSFLERSGEPDAEESRLNRQRREKDRASLASSRE  
RLFRSHLTQFLHFFSDSTSDSSSVRRCSALAGETNRLHRGEVDREKAKSRHRVSFQDAHAEIGRDVTGAETSKTPCSFLPAARAT  
DCRPHEPPRVTAAPSNSPSSPSAFLRDPEGDVPGGACNAETPVGGGPGSERGTTLEAQASLFERARCADEEKKREDEAADASIGD  
TVAQTKERQLPVLSPTRRPRSAEERKRRSGEGCTTQADSGPSAPMYGGRSCLAQATERTYAVGVEEGPCHSGTQSERGTNNGEASR  
VGKDMFASALGERRESGNAKAGGQLWLDSFGSGTPGGEGKSLQNAATVFAVSSRSPLEAPMSGDDTERRGAASGDDAEGRQDKK  
NPSPPSKSASSPDPLPSSPFVFSASPDLSCVSVSCLTSAPPGIVGLGAENAAKQARTAVLSRLGGVSACKEGANGALSVIQE  
EGEEESTETQGTQSEDRSGARGEKKQTEKDKKEKKEKTDKDKDKDKDKDKKEKEVNGDEVERREVRGVEELVASESSPAHEA  
RGAKPSADVGESKYERDSEMGKRSPEVTSRYHTEFIE LQQLGSGGFGSVTKVRQROGGGIFAVKCIPLRPARVRRHGFPCPGQGREF  
NLARAGGNSTGRGMRADAGDAQAARLERARMRSFSGNAKRRVGGQVCAALSGPRONSDQAPKDGACKQAARRKRRDSDLSPTDSQ  
DTYDDAVGYMEEATMLAKLNHKKHIVRYDDAWLEVTTPLRVSPDSSCGAEEGDPKCLFILMEYCPGRTLREAIIDSGLLQLPPASE  
RQTLRRRQTANRVSETAACAPEAGRRLCGSSAYVSSSSCCSPSSRAASELRGAGAAETLAPKGGEPFGQAGNEEAREAREVEVEE  
DDSEERRTEAERRTAAEMGLRALKWRLTRDLVGGVAYMHSFGVIHRDLKPSNIFLKVVDQDRLCVKIGDFGLTTTVLKGKPGGSQA  
AGRRASHSGTSGDTPMGSGASVRPLSGFSCPSQVECEARPNGGKPHPGCPQPLQRLPLVPLSSFPSSHPSDTPSLRLSAGVGTGVY  
YMAPEQATGSRDQKADIFSLGVVLFEMWAPPFTTAMERASVGLQTLDEHQMRLLPRQAGKALPPFHSPAPLKHREKKGDEGDG  
GGEASSVALQSSRLSAPLRPQORRRQORENLLQRTEDKRRLLGAGGDPADPPPSDFTPFDTLFLKQYVPSEVAPLILAMIQQ  
DPASRPAADA LLVDDVLLPLELSQALPLGVVDEYEVDLVRESHEAPSRTEKNGRRGESGKHGSGMAGSAGALGASRGELERGG  
EAQRQGGQGAAGTGEALEAGVCGPKRGKAAGERETGGEVEGSPSLASVSGEGEDDAAGGEAGAGEAGGERSTRSRRGKELKKEK  
RQAAEEEPGSERRWIEGARGGECAGVGDRLRGERLQAHSAHPSLSFSETCVCEVDVTVTQSVGGRREERERRRRGTDRGHRAGGLR  
ARETHSPVSPGAGARRGEASDEEESRRTRRKKHEDALCVRPRPALGHPFKRIYDVIASYPFSNEAVQVMATLLNRHEDEAALHHFL  
LLKRALASEGILLYRLQQFIRGLVRQHCASCERRGATQISLPALLPLTGR LAGSLSWTRRLRHRSKVILDLEKQEDAQRVVEAA  
LKNKGALRTRRASKCLSVAGESEKGAASDGNVSEDPQPSRKARPSRMPPAPTAPAFARSAGASVLCGSASRDVSSARDRPLPE  
PHLFAVPLFRPFLLECKPLQPCASVPFACLPIHTAVAPAAAAGVCTPEAATAAAAVTVEDELLSAEQVSSPGRGVALLLDAATPLIL  
PFSLFHGAAAEAAGRGHASAHLSVPVQRRWAFAPTYIRADCAAGRGSASPRLGKLRSEEEKHSGEKNVGSRRREKSGGRNGFCMR  
CLSLRSGASCPEKGGSEAERSSARRARDRGAQREDDAPACEAAACAPQEIYAALYDLVVDLDAFGNWEEFGGCVSFFGEDDVPRR  
LCRDDGRDQLEAKEFGKALIPGAFFDAEVVAAAADVLAALASPPDSGGASHGQGLLVWMTADLLPAILOHLILIPEDRVRFQA  
NWLVRVQANGSGLTKERLEAHLRAVLYSEDSLGTAREVFSSENGQVPLASDREARGKAENGRQRGDEEMALLQILQRERDENF  
IRQQADLLWALLGIQEDTPEKTI AELISCVLCLDRSREDALLLAEADPSGFVSSSFDLLPISLPPSAERTSVASDGSSHLATSI  
SSLSPLLLQQLRLLRQOELLQVECFPPSQRFNLFPLFDTAQYAHGLVFFVLGAPVMSAPPVPGASGGLTLGGAPGPPFFSGYF  
GSFFAEKSGMFAFSRDALQAGSLAHGDAPPPAGARHPRSHVGLTSKNASQALVSWRRAQQMREVLASGGRYDALLEEVRMQGI  
GEEEDGDRGRGGERDERREAGGHHEKRRRTLSVTGVELAVECIGKRLLLLAQNPKSRFLFSDDALKGPHFLSGAVGAANSTFSR  
EFGGVDAKAQASGLASDATGGSLFVSKHDMHPHPSLFPFPPSAVAGALGPLGPHDPGHPGGTGEATLRNSRVHVHPQASHAPHVSG  
AGAGGEKEGKAPGAAGVSAAGLAPGGLEGRDEGRGRDGRAFANVSRVRSVSGGEERKQAAMEMWRRMGASVKHLFQDAPKWSNQF  
AVLLC VVQPHSERSGAGKTESGSKQRHEERRHAF LAAAAYELRMLRRSAVTCERWISLAERQRMKRPVRRPAGNATSRPSSGAS  
APQALASRDLLQWLVLSSSSSLPSTSVCSPLCASSPPLPGAPASALSLSLAPLAPLATEKGEVSPSASETTVSAEDEQPEEDARQ

TTAKREREKLFAMLDEAVAATDGTAFATTRLHEDEATAVQRENKANVHELNIHIEHLYGEETSQVLTSVNDAVAFLAAVGGPKA  
S

Fig. S2

|          | I                                         | II                                   | III                                      |                              |       |     |
|----------|-------------------------------------------|--------------------------------------|------------------------------------------|------------------------------|-------|-----|
| TgIF2K-C | RYHTEFIELQQLGSGGFGSVTKVRQRQGGG----        | IFAVKCIPLRPAR-105-                   | AVGYMEEATMLAKLNHKKH                      | 1055                         |       |     |
| TgIF2K-D | RYQRDFIQLEVLGSRERYRIALVYHIIDKH----        | KYIVKQIFIPCGP-25--                   | VESALRQVTLLCALQHPY                       | 1398                         |       |     |
| PfeIK1   | RYRDFFEKILGCGGFGYVMKVKNKKFNI----          | TYALKIIRLSNSK-15--                   | NSYIMEEAIMIAKLOHEN                       | 499                          |       |     |
| PbeIK1   | RYRDFSEESVLGCGGFGYVMKVKNKKFNI----         | AYAVKKITLSINK-32--                   | NSLIMEEVIMIAKLOHEN                       | 501                          |       |     |
| TbeIF2K1 | RYRSEFIEQCLLGSGGFAPVYVCRKKVDGR----        | LYAVKKIATRKNNEAEK----                | ALREVQSLAALSHKH                          | 330                          |       |     |
| AtGCN2   | RYLNDFEELKPLGQGGFGHVVLCKNKLDGR----        | QYAVKKIRLKDKEIPV--                   | NSRIIVREVATLSRLQHQH                      | 483                          |       |     |
| DmGCN2   | RLRTEFEVLMYLGKGFAGDVLKVRNILDNR----        | EYAIKKRIPLPARSRQL--                  | YKMTREVELLSRINHEN                        | 581                          |       |     |
| ScGCN2   | RYASDFEETAVLGQGFQVVKARNALDSR----          | YYAIKKIRHTEEKLST----                 | ILSEVMLLASLNHQY                          | 654                          |       |     |
| MmGCN2   | RYFIEFEELQLLGKGFAGVAVIKVQNKLDGC----       | CYAVKRIPINPASRH---                   | FRRIKGEVTLLSRLHHEN                       | 646                          |       |     |
| HsGCN2   | RYFIEFEELQLLGKGFAGVAVIKVQNKLDGC----       | CYAVKRIPINPASRQ---                   | FRRIKGEVTLLSRLHHEN                       | 647                          |       |     |
|          |                                           | *                                    |                                          |                              |       |     |
|          | IV                                        | V                                    | VIA                                      |                              |       |     |
| TgIF2K-C | IVRYYDAWLE-24--                           | LFILMEYCP-GRTLREAI                   | DSSGLLQLPPASFRQTLRRR-98-                 | MGLRALKWRLTRDL               | 1236  |     |
| TgIF2K-D | IMRYHQAWTQ-39--                           | VYVQMEFCER--                         | SLEDEIEKRTVL-----                        | HWDSQOIWTLFRQT               | 1483  |     |
| PfeIK1   | IVRYYDAWVE-99--                           | LYILMEYCP-GKTLREAI                   | DCGFI-----                               | CRNEKLIWELIKQI               | 644   |     |
| PbeIK1   | IVRYYDAWVE-57--                           | LYILMEYCP-GKTLREAI                   | DCGFI-----                               | YKNEKLIWELIKQI               | 604   |     |
| TbeIF2K1 | IVRYYDAWIE-100-                           | LYIQMELCSK-HSLRHLIDQ                 | CDKEEGSLLTA-----                         | GNGDKVATKIFRQL               | 484   |     |
| AtGCN2   | VVRYQAWE-43--                             | LYIQMEYCPR--                         | TLRVFESY-N-----                          | HFDKDFAWHLIRQI               | 570   |     |
| DmGCN2   | VVRYFNSWIE-102-                           | MYIQMEFCEK-CTLR                      | TAIDDN-L-----                            | FNDTDLRWRLFREI               | 728   |     |
| ScGCN2   | VVRYAAWLE-119-                            | LFIQMEYCEN-RTLY                      | DLIHSENL-----                            | NQQRDEYWRLFROI               | 819   |     |
| MmGCN2   | IVRYNAWIE-139-                            | LYIQMEYCEKS-TLR                      | TIDQG-L-----                             | FRDTSRLWRLFREI               | 830   |     |
| HsGCN2   | IVRYNAWIE-146-                            | LYIQMEYCEKS-TLR                      | TIDQG-L-----                             | YRDTVRLWRLFREI               | 832   |     |
|          | VIA                                       | VIB                                  | VII                                      |                              |       |     |
| TgIF2K-C | VGGVAYMHSFGVIHRDLKPSNIFLKVDQDRLC----      |                                      | VKIGDFGLTTTIVLKGKPGGSQAAGR-58-           | PLSS                         | 1354  |     |
| TgIF2K-D | LEALVYIHRNRVCHLSLKPSNVFLEPDAYGYN----      |                                      | VKLGDFGITSLFSIV-----                     |                              | 1530  |     |
| PfeIK1   | LKGISYIHDMMKIMHRDIKPSNIFLQITDNILI----     |                                      | AKIGDFGLTTRIG-----                       |                              | 689   |     |
| PbeIK1   | LKGIYYIHDMMKMMHRDIKPSNIFLQINDDILS----     |                                      | AKIGDFGLTTKID-----                       |                              | 649   |     |
| TbeIF2K1 | LTVVSHFHROGIVHRDLKPDNIFEMQSSVSSDDVGTIRVAD | FLGARTLHRSMKHSPSNVELN-----           |                                          |                              | 546   |     |
| AtGCN2   | VEGLAHIHQGGIIHRDFTPNNIFFDARND-----        |                                      | IKIGDFGLAKFLK-----                       |                              | 612   |     |
| DmGCN2   | AEGLAHIHQGGIIHRDLKPVNIFLDSHDQ-----        |                                      | IKIGDFGLATTSFLA-----                     |                              | 772   |     |
| ScGCN2   | LEALSYIHSQGGIIHRDLKPMNIFIDESRN-----       |                                      | VKIGDFGLAKNVHRSLDILKLDSON-----           |                              | 873   |     |
| MmGCN2   | LDGLAYIHEKGMIIHRDLKPVNIFLSDDDH-----       |                                      | VKIGDFGLATDHLAFTAEGKQDDQA-----           |                              | 884   |     |
| HsGCN2   | LDGLAYIHEKGMIIHRDLKPVNIFLSDDDH-----       |                                      | VKIGDFGLATDHLAFSADSKQDDQT-----           |                              | 886   |     |
|          | VIII                                      | IX                                   |                                          |                              |       |     |
| TgIF2K-C | FPGSHPSDTPSLRLSAGVGTVYYMAPEQATGSR-----    |                                      | YDQKADIFSLGVVLFEMWAP--                   | PFTTA                        | 1412  |     |
| TgIF2K-D | -----                                     | HNVHSPISRLYTAPELL-                   | GAADRKFASLTMRDADKADMYSLGVLFAEMWGRHEMFGRS |                              | 1587  |     |
| PfeIK1   | -----                                     | DTQINPSAGTIHYISPEQLNGEP-----         |                                          | FNEKADIFSLGVVFFEMFHE--       | PFSTS | 737 |
| PbeIK1   | -----                                     | NTQINPSAGTVNYMSPEQLNGEH-----         |                                          | FDQKADIFSLGVVFFEMFHE--       | PFSTS | 697 |
| TbeIF2K1 | DVRPLDELEVGPSPTGNLGSVVYCAPEQERGES-----    |                                      |                                          | YDFSVDSEYSLGMIALEMWLAV-AGQGF | 606   |     |
| AtGCN2   | -----                                     | VAGSGVDSITGQAGTYFYTAPEIEQDWPK-----   |                                          | IDEKADMYSLGVVFFELWH--        | PFGTA | 677 |
| DmGCN2   | -----                                     | ITSAEDGTGTKVGTTLTYVAPELTGNASKSV----- |                                          | YNQKVDMYTLGIILFEMCQP--       | PFDTG | 841 |
| ScGCN2   | -----                                     | LPGSSDNLTSAIGTAMYVATEVLDGTGH-----    |                                          | YNEKIDMYSLGIIFFEMIY--        | PFSTG | 925 |
| MmGCN2   | -GDGVIKSDPSGHLTGMVGTALYVSPEV-QGSTKSA----- |                                      |                                          | YNQKVDLFSLGIIFFEMSYH--       | PMVTA | 943 |
| HsGCN2   | -GD-LIKSDPSGHLTGMVGTALYVSPEV-QGSTKSA----- |                                      |                                          | YNQKVDLFSLGIIFFEMSYH--       | PMVTA | 944 |

## X

## XI

|          |                                                                         |      |
|----------|-------------------------------------------------------------------------|------|
| TgIF2K-C | MERASVLGQLTLDHEQMRRLPRQ-94-QYVPSEVAPLILAMIQODPASRPAADALLVDDVLLPLELSQ    | 1572 |
| TgIF2K-D | CSRIEFLTSLVKERNLQ-----QLNVPSAAVKIILKHLSPNPGDRPSSMTLLQSSLLPPAVEED        | 1646 |
| PfeIK1   | MERSITLSNLLKGIYPEYM-----KADNKKFQFLSSLLAINPQERCCAYNLLHESVLFTFEKDF        | 796  |
| PbeIK1   | MERSIVLSNLLKCIYPESI-----RSDNKIFQFLSLLLEIDPQNRLSAYSLLHENFFFSYEKNF        | 756  |
| TbeIF2K1 | RERFNIMTDISRGKPIPQWF-----YAWNPRMAEVIIASLLERDPGKRRTSEEILNKADLPADVPADV    | 667  |
| AtGCN2   | MERHVILTNLKLKLGELPLK-----WVNEFPEQASLLRRI MSPSPSDRPSATELLKHAFPPRMESEL    | 738  |
| DmGCN2   | MERAQTIMALRNV SINIPD-----AMLKDPKYEKTVMKLQWLLNHDPAQRPTAEELLI SDLVPPAQLEA | 905  |
| ScGCN2   | MERNVILKRLRS-VSIEFPP-----DFDDNKMKVEKKIIRLLIDHDPNKRPGARTLLNSGWL PVKHQDE  | 988  |
| MmGCN2   | SERIFVLNQLRDPTSPKFP-----DDFDDGEHTKQKSVI SWLLNHDPAKRPTAMELLKSELLPPPQ MEE | 1007 |
| HsGCN2   | SERIFVLNQLRDPTSPKFPE-----DFDDGEHAKQKSVI SWLLNHDPAKRPTATELLKSELLPPPQ MEE | 1008 |

Fig. S3

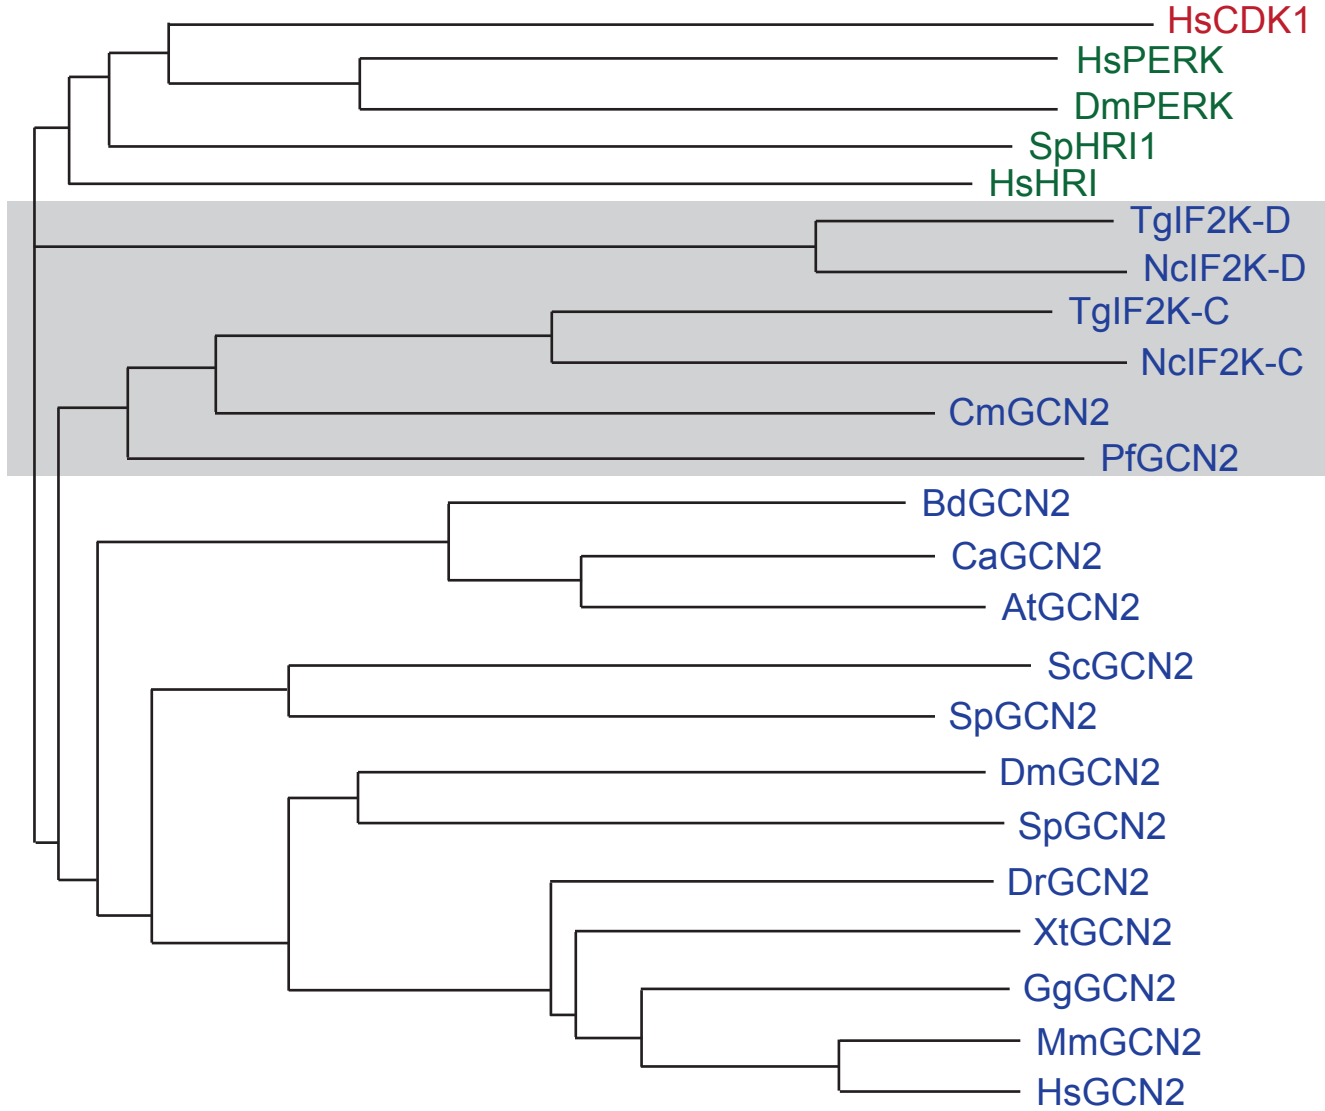

Supplement: NIHMS531664-supplement-01.pdf [file NIHMS531664-supplement-01.pdf]
